# Supplementary material for: Temporal and Pharmacological Characterization of Angiostatin Release and Generation by Human Platelets: Implications for Endothelial Cell Migration
Source: PubMed Central journal article supplement (PMC3598756; doi:10.1371/journal.pone.0059281), 2013-03-15
Supplement: pone.0059281.s001.pdf [file pone.0059281.s001.pdf]

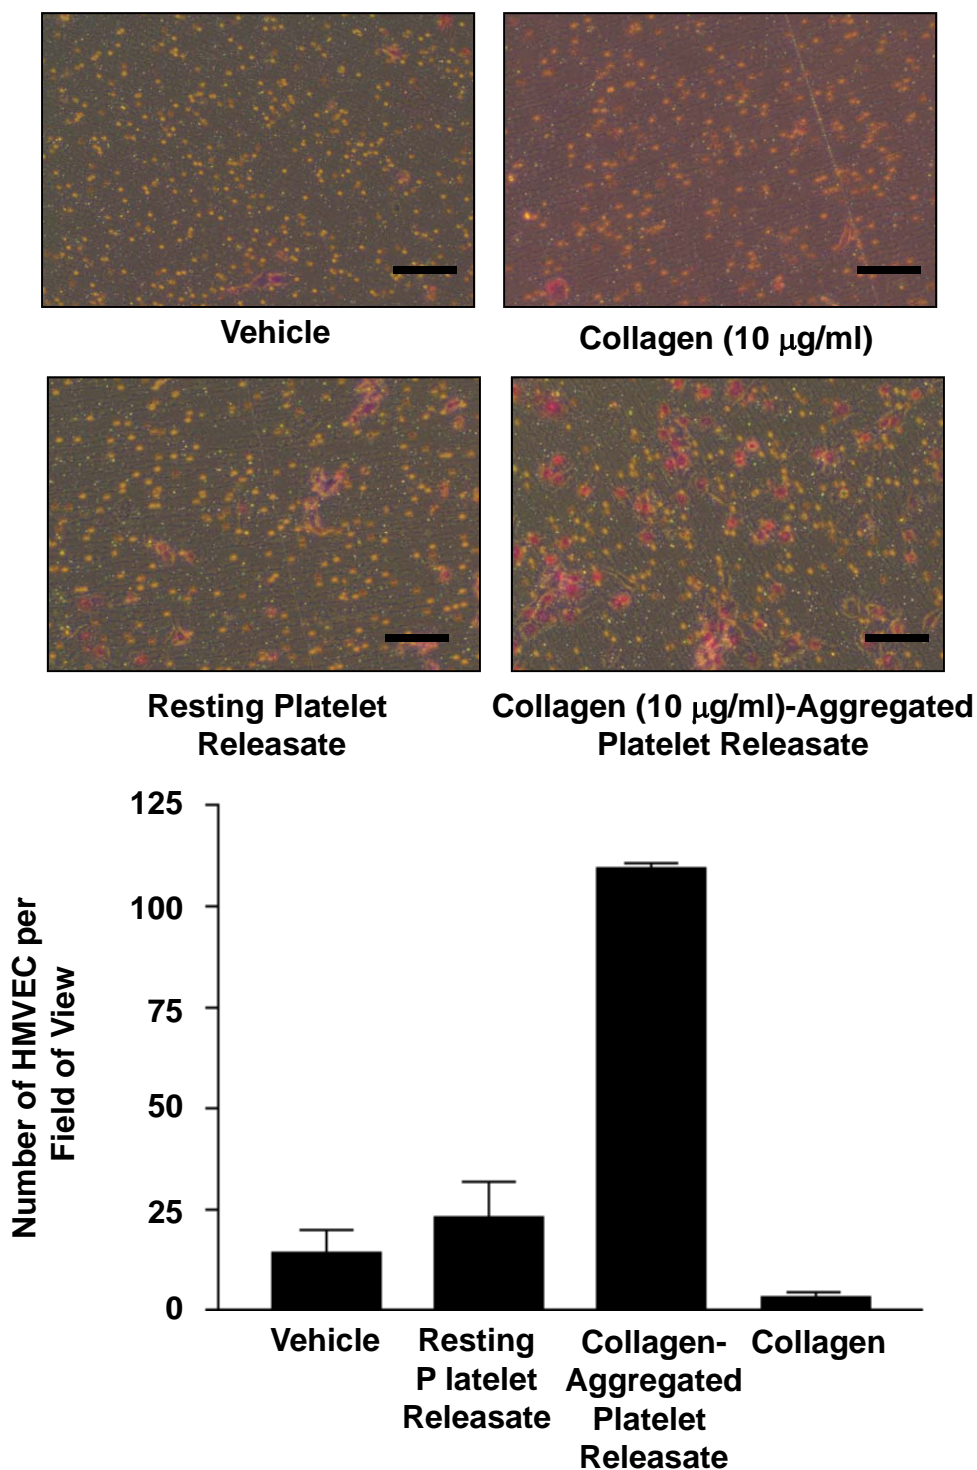

**Supplemental Data Figure 1.** Representative photomicrographs and summary data of endothelial cell migration under normoxic conditions toward a platelet releasate gradient. Releasates from collagen-aggregated platelets (maximum aggregation time point) provide a stronger stimulus for endothelial cell migration than resting (non-activated) platelet releasates. Summary data from two independent experiments performed in duplicate. Scale bars indicate 100 µm.
